# Supplementary material for: Identification of Characteristic Bioactive Compounds in Silkie Chickens, Their Effects on Meat Quality, and Their Gene Regulatory Network
Source: MDPI journal article supplement (doi:10.3390/foods13060969), 2024-03-21
Supplement: s1 [file s1]

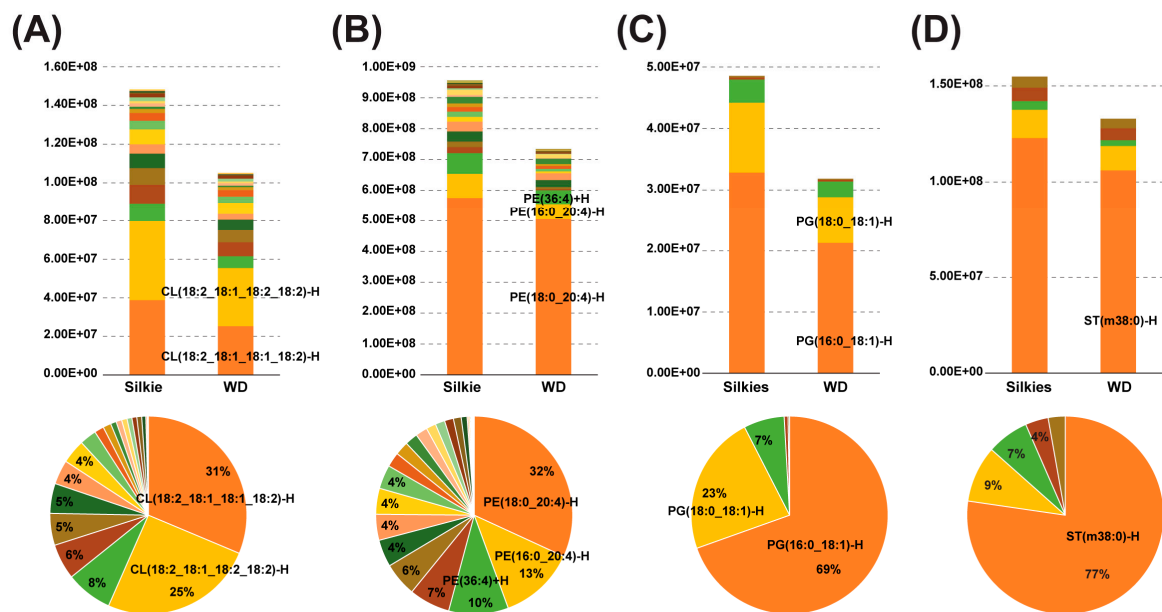

**Figure S1.** Contribution of significantly upregulated lipid molecules to significantly upregulated lipid subclasses in Silkies chickens.
